# Supplementary material
Source: PubMed Central journal article supplement (PMC4818251)
Supplement: 15_126_Chen_Suppl.pdf [file 15_126_Chen_Suppl.pdf]

## Supplemental Data

# Differential Sensitivities of Fast- and Slow-Cycling Cancer Cells to Inosine Monophosphate Dehydrogenase 2 Inhibition by Mycophenolic Acid

Kan Chen,<sup>1,2\*</sup> Wanlu Cao,<sup>1\*</sup> Juan Li,<sup>1</sup> Dave Sprengers,<sup>1</sup> Pratika Y Hernanda,<sup>3</sup> Xiangdong Kong,<sup>2</sup> Luc JW van der Laan,<sup>4</sup> Kwan Man,<sup>5</sup> Jaap Kwekkeboom,<sup>1</sup> Herold J Metselaar,<sup>1</sup> Maikel P Peppelenbosch,<sup>1</sup> and Qiuwei Pan<sup>1</sup>

Online address: <http://www.molmed.org>

The Feinstein Institute  
for Medical Research   
Empowering Imagination. Pioneering Discovery.\*

**Supplementary Table S1.** STR genotyping of seven cancer cell lines.

| STR     | Panc-1 | BxPC-3 | Caco2    | HeLa   | HepG2 | HuH7   | SKOV-3   |
|---------|--------|--------|----------|--------|-------|--------|----------|
| D3S1358 | 17     | 14/16  | 14/17    | 18/18  | 15/16 | 15/15  | 14/14    |
| TH01    | 7/8    | 9      | 6        | 7/7    | 9/9   | 7/7    | 9/9,3    |
| D21S11  | 28     | 29     | 30       | 27/28  | 29/31 | 30/30  | 30/31,2  |
| D18S51  | 12     | 12     | 12       | uitval | 13    | uitval | 16/17/18 |
| Penta_E | 7/14   | 12/14  | 7        | uitval | 15/20 | 11/11  | 5/13     |
| D5S818  | 11/13  | 11     | 12/13    | 12/14  | 11/13 | 12/12  | 11/11    |
| D13S317 | 11     | 11     | 11/13/14 | 12/14  | 9/13  | 10/11  | 8/11     |
| D7S820  | 8/10   | 10/13  | 11/12    | 8/12   | 10/10 | 10/11  | 13/14    |
| D16S539 | 11     | 9/11   | 12/13    | 10/10  | 12/13 | 10/10  | 12/12    |
| CSF1PO  | 10/12  | 13     | 11       | 9/10   | 10/11 | 11/11  | 11/11    |
| Penta_D | 14     | 14     | 9        | 8/8    | 9/13  | 12/12  | 12/13    |
| AMEL    | X      | X      | X        | XX     | XY    | XX     | XX       |
| vWA     | 15     | 14/18  | 16/18    | 16/18  | 17/17 | 16/18  | 17/18    |
| D8S1179 | 14/15  | 13     | 12/14    | uitval | 15/16 | 14/14  | 14/15    |
| TPOX    | 8/11   | 8      | 9/11     | 8/12   | 8/9   | 8/11   | 8/11     |
| FGA     | 21     | 20/21  | 19       | 21     | 22/25 | 22/22  | 24/25    |
| Match   | 87%    | 81%    | 77%      | 84%    | 74%   | 94%    | 71%      |

The STR match threshold are range from 71% to 94%.

STR genotyping information come from the website: <http://strdb.cogcell.org/>.

**A**

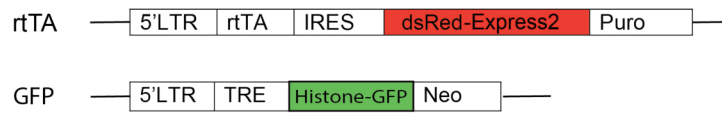

**B**

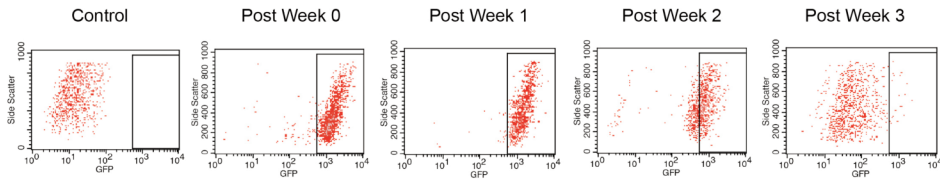

**C**

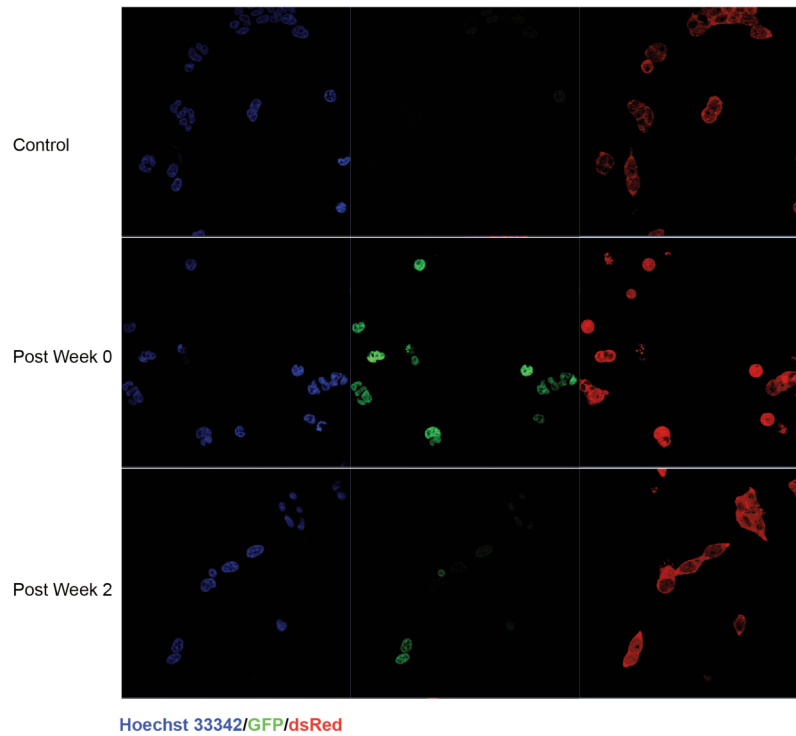

**Supplementary Figure S1.** Label retaining HeLa<sup>tet-on</sup> cell line expressing histone2B-GFP in a Tet-inducible fashion. (A) Plasmids pLV.EX3D/EF1A-rtTA(M2)-dsRed-Express2 and pLV.EX2D/TRE-eGFP were used. (B,C) GFP retaining condition *in vitro* could be detected even 3 wks after doxycycline withdraw.

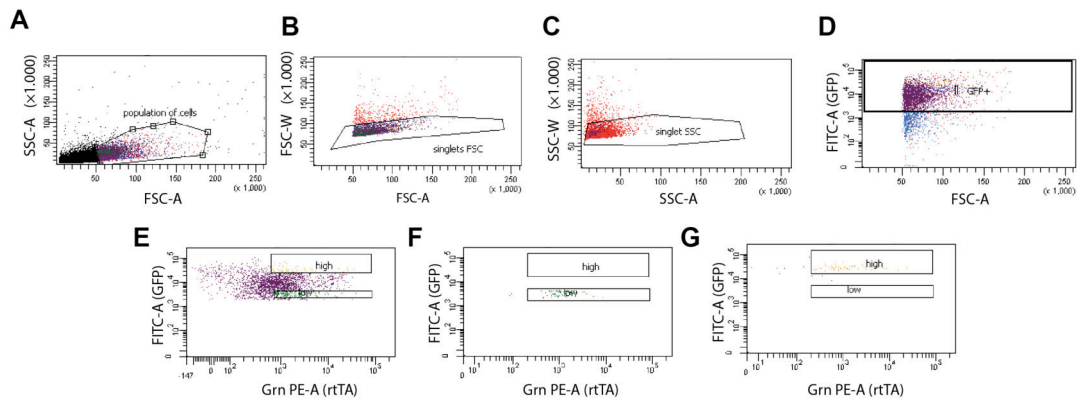

**Supplementary Figure S2.** Tumor tissue were dissociated into single cell suspension and sorted for Non-LRCs (GFP<sup>low</sup>dsRed) and LRCs (GFP<sup>high</sup>dsRed) by FACS.

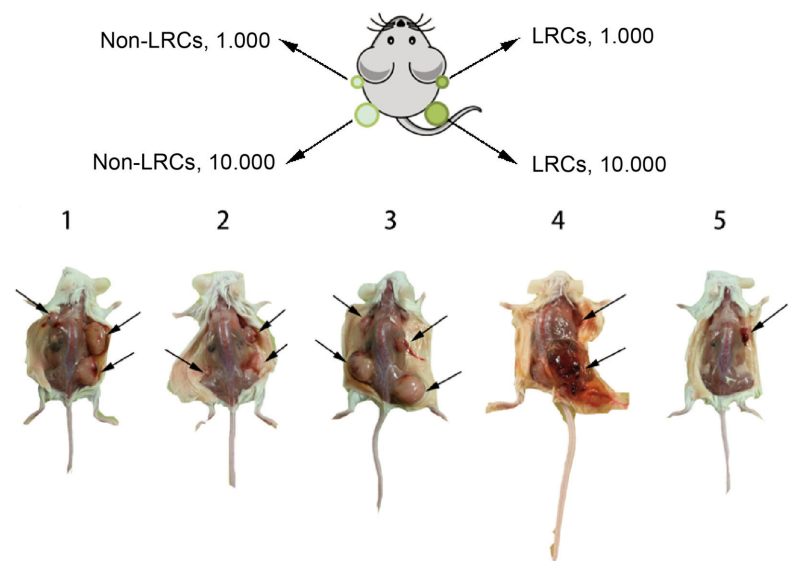

**Supplementary Figure S3.** Non-LRCs and LRCs were injected subcutaneously into mice with cell number of 1.000 and 10.000 on four sites. Arrows indicate tumor formation.

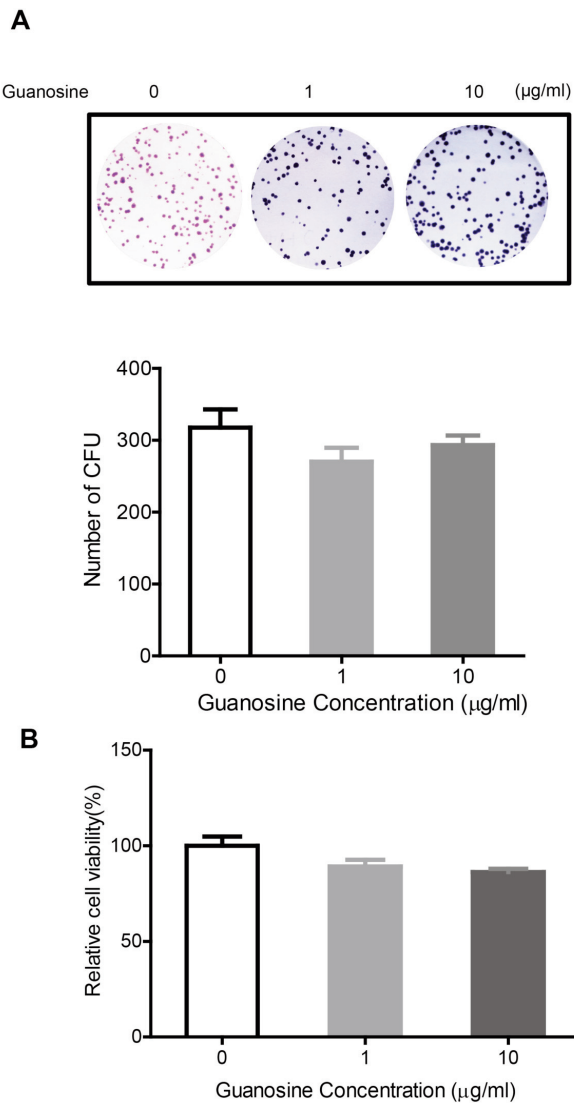

**Supplementary Figure S4.** Guanosine alone did not significantly affect cell proliferation. (A) CFU appearance and numbers. (B) MTT assay.

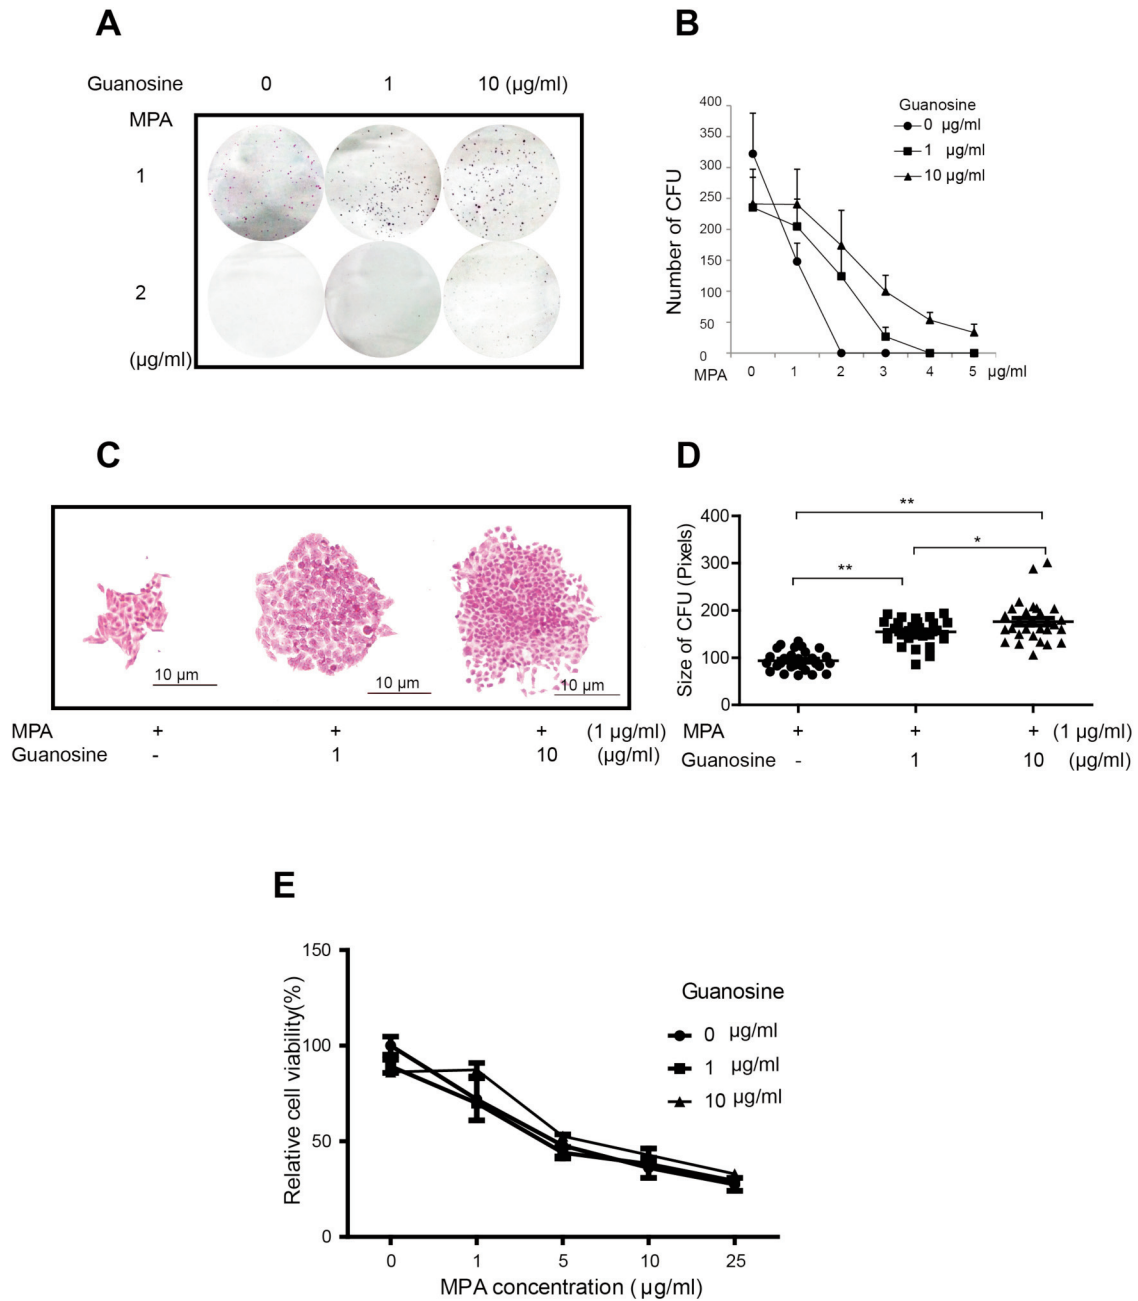

**Supplementary Figure S5.** Anti-proliferative effects of MPA were partially restored by supplementation of exogenous guanosine. (A,B) The number of CFU, (C,D) The size of CFU were partially restored by supplementation of exogenous guanosine during treatment of the HeLa cell line with MPA (Mean ± SD or SEM, n = 6 or 30, respectively, \*P < 0.05; \*\*P < 0.01).

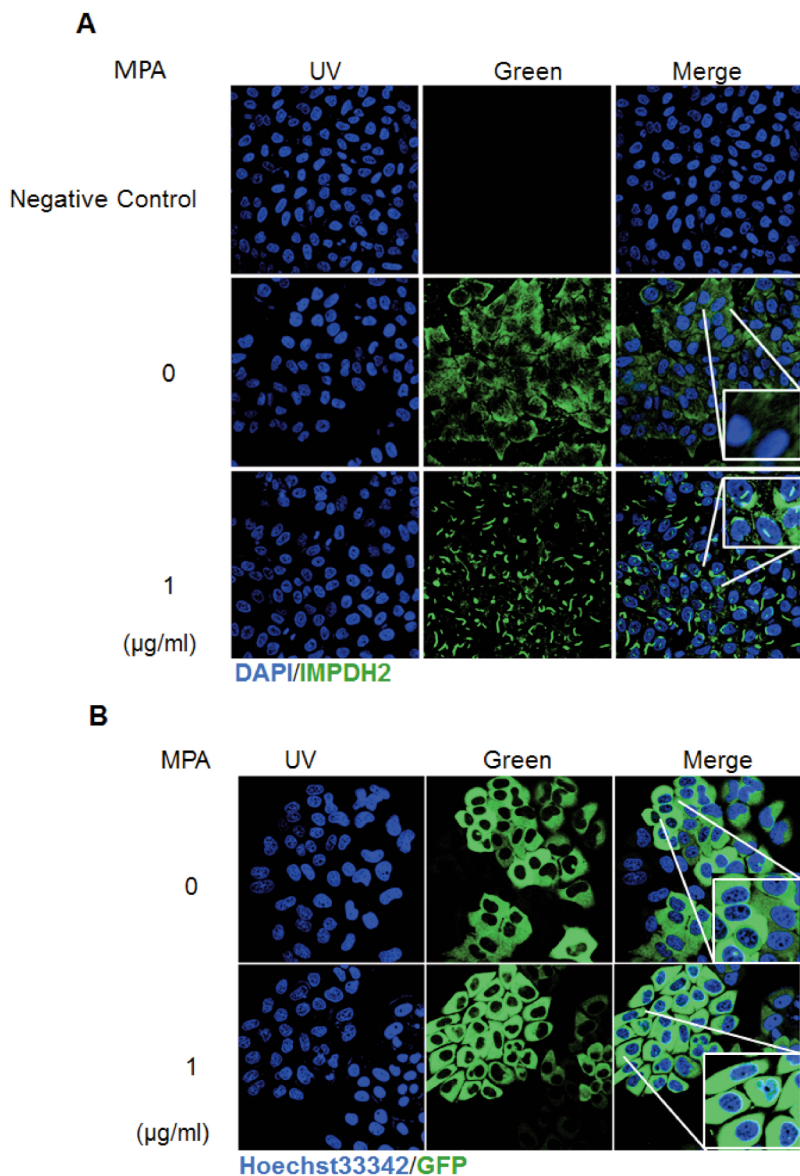

**Supplementary Figure S6.** Cellular localization of IMPDH2 protein. (A) IMPDH2 protein predominately located in cytoplasm, but translocate into nucleus upon MPA treatment in HeLa cells. Blue: DAPI nuclear staining. Green: antibody against Human IMPDH2. (B) A mutated IMPDH2 (fused with GFP) lacking the binding site of MPA was not able to translocate into nucleus even with treatment of MPA in HeLa cells. Blue: DAPI nuclear staining. Green: GFP

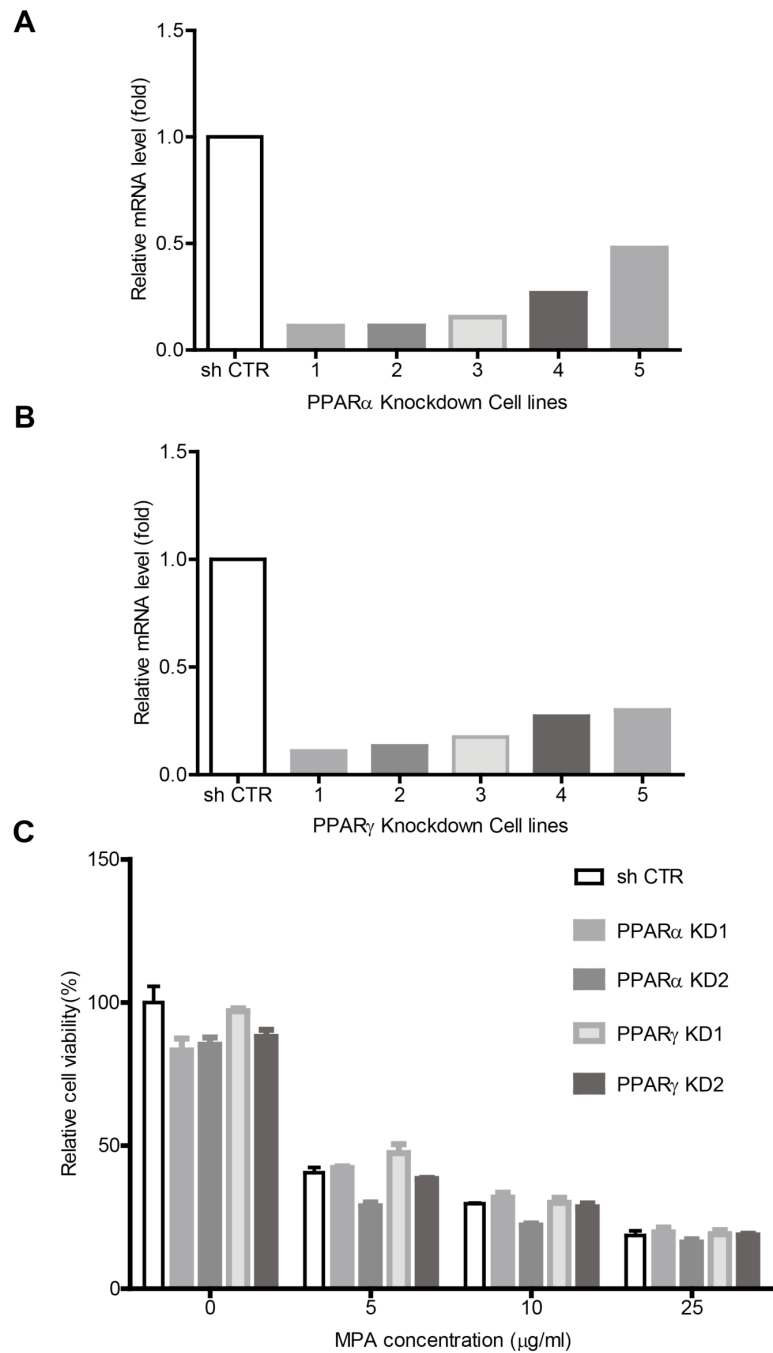

**Supplementary Figure S7.** Knockdown of PPAR $\alpha$  or PPAR $\gamma$  did not affect the sensitivity of HeLa cells to MPA treatment. (A,B) Relative mRNA levels of PPAR $\alpha$  or PPAR $\gamma$  in HeLa cells transduced with 5 different lentiviral shRNA clones, GAPDH was used as an internal reference. (C) Clone 1 (KD1) and 2 (KD2) for each gene were selected to perform MTT assay.
